# Supplementary material for: Time-Lapse Imaging of Neuroblastoma Cells to Determine Cell Fate upon Gene Knockdown
Source: PubMed Central journal article supplement (PMC3521006; doi:10.1371/journal.pone.0050988), 2012-12-12

## DLGAP5

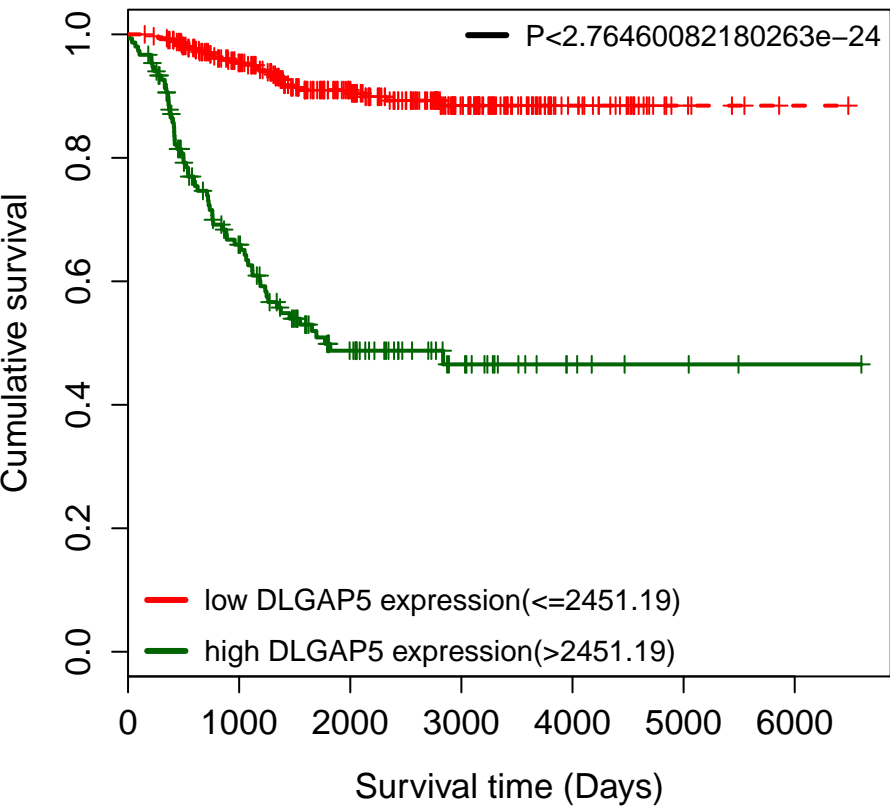

## SMO

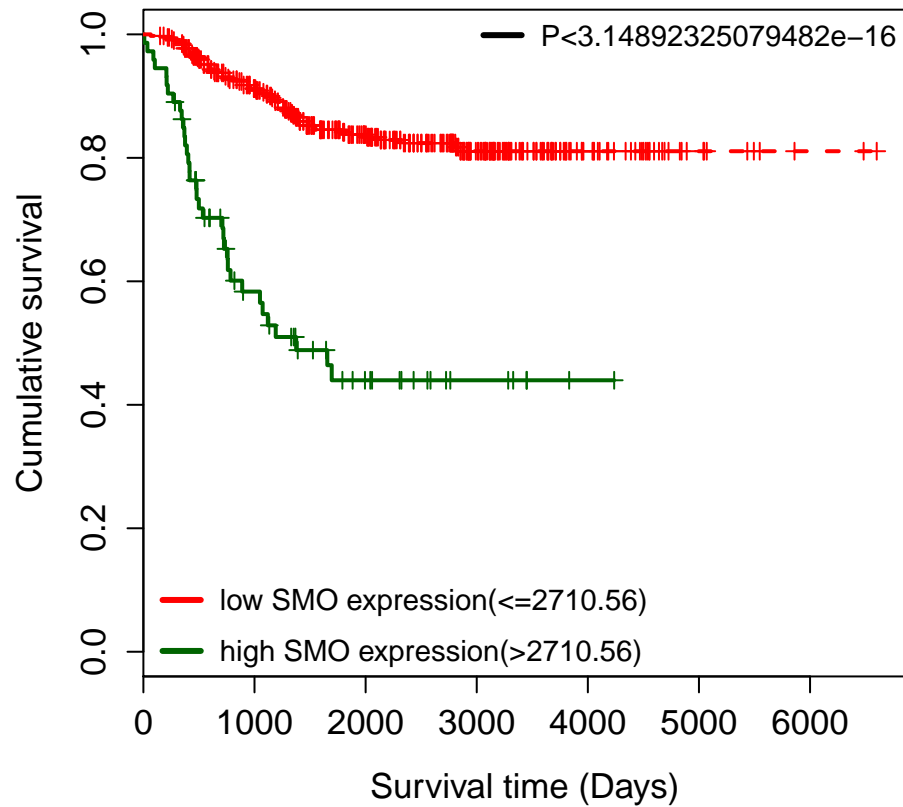

Supplement: pone.0050988.s004.pdf [file pone.0050988.s004.pdf]
