# Supplementary material for: Time-Lapse Imaging of Neuroblastoma Cells to Determine Cell Fate upon Gene Knockdown
Source: PubMed Central journal article supplement (PMC3521006; doi:10.1371/journal.pone.0050988), 2012-12-12

DSCC1

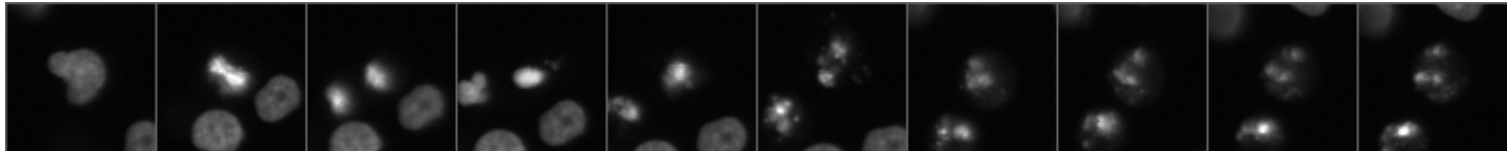

SSBP1

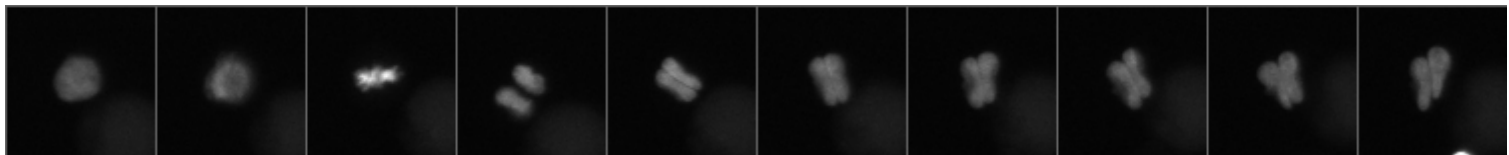

SNRPD1

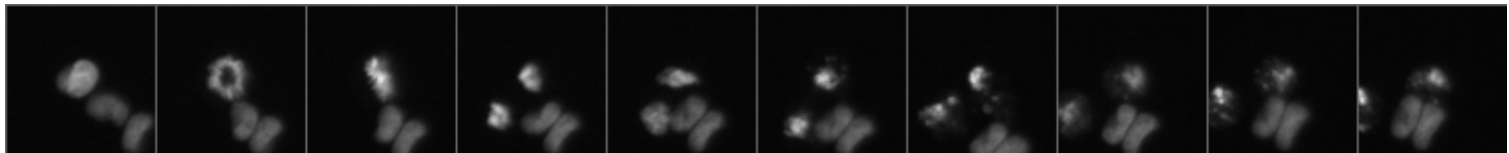

UBE2C

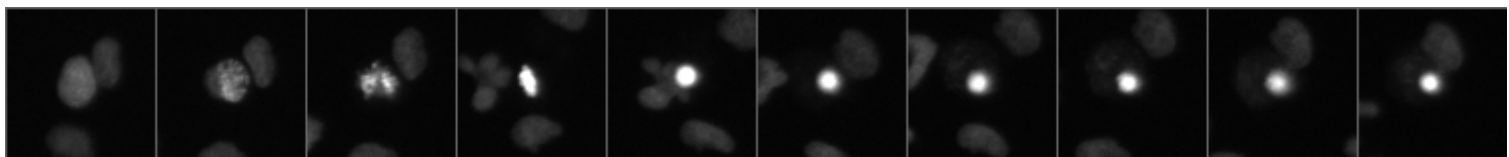

DLGAP5

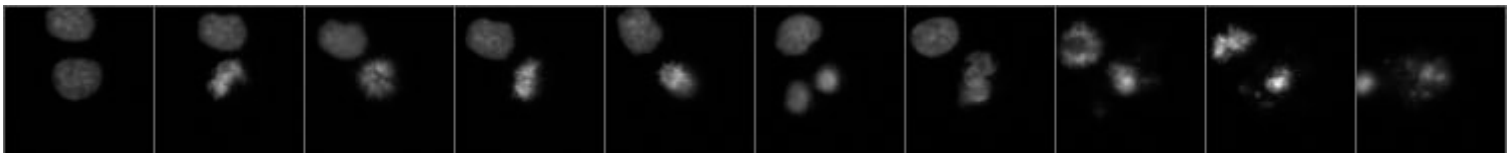

SMO

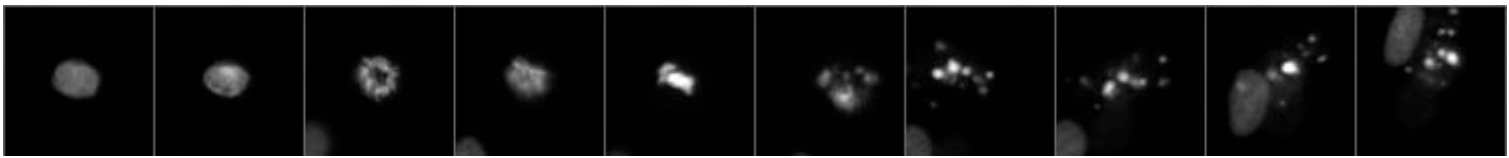

Supplement: pone.0050988.s005.pdf [file pone.0050988.s005.pdf]
